# Supplementary material for: A structure of substrate-bound Synaptojanin1 provides new insights in its mechanism and the effect of disease mutations
Source: eLife. 2020 Dec 22;9:e64922. doi: 10.7554/eLife.64922 (PMC7781601; doi:10.7554/eLife.64922)
Supplement: Figure 4—figure supplement 1—source data 1. [file elife-64922-fig4-figsupp1-data1.xlsx]

## Sheet: StandardCurve_Nb15
Figure 4 - figure supplement 1A - Source data
Buffer: 25 mM Hepes pH 7.5; 150 mM NaCl; 2 mM MgCl2; 5% glycerol; 1 mM DTT
Temperature: 25°C
Data were fit on a linear regression.
[phosphate] (µM)	Measurement 1	Measurement 2	Measurement 3	Measurement 4
40		0.843	0.804	0.747
32	0.697	0.717	0.665	0.598
24	0.599	0.545	0.526	0.489
16	0.383	0.411	0.408	0.351
12	0.312	0.331	0.319	0.247
8	0.244	0.248	0.234	0.187
4	0.161	0.211	0.217	0.116
0	0.094	0.091	0.094	0.073
Slope of the standard curve = 0.01794

## Sheet: Nb15
Figure 4 - figure supplement 1A - Source data
Buffer: 25 mM Hepes pH 7.5; 150 mM NaCl; 5 mM MgCl2; 5% glycerol; 1 mM DTT
Temperature = 25°C
Concentration Synj1 = 2.5 nM
Concentration Nanobody15 = 100 nM
Equation used to fit data in figure S5A : Y=Vmax*X/(Km+X); variables: Vmax, Km. Software used: Graphpad Prism
Measurement 1 - diC8-PI(3,4,5)P3
Values are OD values obtained from SPECTROstarNano (BMG Labtech) plate reader at 620 nm.
Time (s)	5 µM	20 µM	40 µM	80 µM	130 µM							[diC8-PI(3,4,5)P3] (µM)	Slope (OD/s)	Velocity v (µM/s)	v/e0 (1/s)
0	0.097	0.12	0.165	0.312	0.419							5	0.00013	0.00724638	2.89855
60	0.106	0.151	0.19	0.328								20	0.00042	0.0234114	9.36455
120	0.113	0.17	0.229		0.45							40	0.00053	0.0295429	11.8172
												80	0.00027	0.0150502	6.02007
												130	0.00026	0.0144928	5.7971
Measurement 2 - diC8-PI(3,4,5)P3
Values are OD values obtained from SPECTROstarNano (BMG Labtech) plate reader at 620 nm.
Time (s)	5 µM	20 µM	40 µM	80 µM	130 µM							[diC8-PI(3,4,5)P3] (µM)	Slope (OD/s)	Velocity v (µM/s)	v/e0 (1/s)
0	0.079	0.117	0.149	0.259								5	3e-05	0.00167224	0.668896
60		0.128	0.184	0.299	0.396							20	0.00019	0.0105909	4.23634
120	0.082	0.14	0.207	0.315	0.43							40	0.00048	0.0267559	10.7023
												80	0.00047	0.0261984	10.4794
												130	0.00057	0.0317726	12.709
Measurement 3 - diC8-PI(3,4,5)P3
Values are OD values obtained from SPECTROstarNano (BMG Labtech) plate reader at 620 nm.
Time (s)	5 µM	20 µM	40 µM	80 µM	130 µM							[diC8-PI(3,4,5)P3] (µM)	Slope (OD/s)	Velocity v (µM/s)	v/e0 (1/s)
0	0.078	0.126	0.182	0.298	0.486							5	3e-05	0.00167224	0.668896
60		0.139	0.196	0.329	0.509							20	0.00024	0.0133779	5.35117
120	0.082	0.155			0.53							40	0.00023	0.0128205	5.12821
												80	0.00052	0.0289855	11.5942
												130	0.00037	0.0206243	8.24972

## Sheet: StandardCurve_pH5.5
Figure 4 - figure supplement 1B - Source data
Buffer: 25 mM sodium citrate pH 5.5; 150 mM NaCl; 5 mM MgCl2; 5% glycerol; 1 mM DTT
Temperature: 25°C
Data were fit on a linear regression.
[phosphate] (µM)	Measurement 1	Measurement 2
40	0.826	0.851
32	0.684	0.7
24	0.508	0.598
16	0.358	0.41
12	0.298	0.334
8	0.201	0.312
4	0.107	0.216
0	0.074	0.147
Slope of the standard curve = 0.0185

## Sheet: pH 5.5
Figure 4 - figure supplement 1B - Source data
Buffer: 25 mM Sodium citrate pH 5.5; 150 mM NaCl; 5 mM MgCl2; 5% glycerol; 1 mM DTT
Temperature = 25°C
Concentration Synj1 528-873 = 2.5 nM
Equation used to fit data in figure S5B: Y=Vmax*X/(Km+X); variables: Vmax, Km. Software used: Graphpad Prism
Measurement 1 - diC8-PI(3,4,5)P3
Values are OD values obtained from SPECTROstarNano (BMG Labtech) plate reader at 620 nm.
Time (s)	20 µM	40 µM	80 µM	130 µM						[diC8-PI(3,4,5)P3] (µM)	Slope (OD/s)	Velocity v (µM/s)	v/e0 (1/s)
0	0.12	0.283	0.273	0.504						20	1e-05	0.000540541	0.216216
60	0.12	0.294	0.308	0.51						40	0.00017	0.00918919	3.67568
120	0.121	0.303		0.572						80	0.00058	0.0313514	12.5405
										130	0.00057	0.0308108	12.3243
Measurement 2 - diC8-PI(3,4,5)P3
Values are OD values obtained from SPECTROstarNano (BMG Labtech) plate reader at 620 nm.
Time (s)	20 µM	40 µM		130 µM						[diC8-PI(3,4,5)P3] (µM)	Slope (OD/s)	Velocity v (µM/s)	v/e0 (1/s)
0	0.145			0.62						20	3e-05	0.00162162	0.648649
60	0.147	0.176		0.669						40	0.0003	0.0162162	6.48649
120		0.194
										130	0.00082	0.0443243	17.7297
Measurement 3 - diC8-PI(3,4,5)P3
Values are OD values obtained from SPECTROstarNano (BMG Labtech) plate reader at 620 nm.
Time (s)	20 µM	40 µM	80 µM	130 µM						[diC8-PI(3,4,5)P3] (µM)	Slope (OD/s)	Velocity v (µM/s)	v/e0 (1/s)
0	0.119	0.15	0.241	0.65						20	6e-05	0.00324324	1.2973
60	0.125	0.159	0.274	0.691						40	0.00015	0.00810811	3.24324
120	0.126		0.283							80	0.00035	0.0189189	7.56757
										130	0.00068	0.0367568	14.7027
