# Supplementary material for: A structure of substrate-bound Synaptojanin1 provides new insights in its mechanism and the effect of disease mutations
Source: eLife. 2020 Dec 22;9:e64922. doi: 10.7554/eLife.64922 (PMC7781601; doi:10.7554/eLife.64922)
Supplement: Figure 4—figure supplement 2—source data 1. [file elife-64922-fig4-figsupp2-data1.xlsx]

## Sheet: StandardCurve
Figure 4 - figure supplement 2 & Table 2 (Y793C) - Source data
Buffer: 25 mM Hepes pH 7.5; 150 mM NaCl; 2 mM MgCl2; 5% glycerol; 1 mM DTT
Temperature: 25°C
Data were fit on a linear regression.
[phosphate] (µM)	Measurement 1	Measurement 2	Measurement 3	Measurement 4
40		0.843	0.804	0.747
32	0.697	0.717	0.665	0.598
24	0.599	0.545	0.526	0.489
16	0.383	0.411	0.408	0.351
12	0.312	0.331	0.319	0.247
8	0.244	0.248	0.234	0.187
4	0.161	0.211	0.217	0.116
0	0.094	0.091	0.094	0.073
Slope of the standard curve = 0.01794

## Sheet: diC8-PI(3,4,5)P3
Figure 4 - figure supplement 2 & Table 2 (Y793C) - Source data
Buffer: 25 mM Hepes pH 7.5; 150 mM NaCl; 5 mM MgCl2; 5% glycerol; 1 mM DTT
Temperature = 25°C
Concentration Synj1 528-873 Y793C = 5 nM
Equation used to fit data in figure S4 (diC8-PI(3,4,5)P3): Y=Vmax*X/(Km+X); variables: Vmax, Km. Software used: Graphpad Prism
Measurement 1 - diC8-PI(3,4,5)P3
Values are OD values obtained from SPECTROstarNano (BMG Labtech) plate reader at 620 nm.
Time (s)	5 µM	10 µM	20 µM	40 µM	60 µM	80 µM	130 µM		[diC8-PI(3,4,5)P3] (µM)	Slope (OD/s)	Velocity v (µM/s)	v/e0 (1/s)
0	0.094	0.106	0.14	0.202	0.29	0.388	0.583		5	3e-05	0.00167224	0.334448
60	0.095	0.113	0.152	0.234	0.322	0.412	0.601		10	0.00013	0.00724638	1.44928
120	0.098	0.122	0.17	0.26	0.344	0.428	0.648		20	0.00025	0.0139353	2.78707
									40	0.00048	0.0267559	5.35117
									60	0.00045	0.0250836	5.01672
									80	0.00033	0.0183946	3.67893
									130	0.00054	0.0301003	6.02007
Measurement 2 - diC8-PI(3,4,5)P3
Values are OD values obtained from SPECTROstarNano (BMG Labtech) plate reader at 620 nm.
Time (s)	5 µM	10 µM	20 µM	40 µM	60 µM	80 µM	130 µM		[diC8-PI(3,4,5)P3] (µM)	Slope (OD/s)	Velocity v (µM/s)	v/e0 (1/s)
0	0.098	0.106	0.138	0.226	0.315	0.378	0.592		5	7e-05	0.0039019	0.780379
60	0.102	0.114	0.155	0.261	0.354	0.395	0.615		10	0.00022	0.0122631	2.45262
120	0.105	0.132	0.171	0.264	0.385	0.433	0.646		20	0.00028	0.0156076	3.12152
									40	0.00032	0.0178372	3.56745
									60	0.00058	0.03233	6.466
									80	0.00046	0.025641	5.12821
									130	0.00045	0.0250836	5.01672
Measurement 3 - diC8-PI(3,4,5)P3
Values are OD values obtained from SPECTROstarNano (BMG Labtech) plate reader at 620 nm.
Time (s)	5 µM	10 µM	20 µM	40 µM	60 µM	80 µM	130 µM		[diC8-PI(3,4,5)P3] (µM)	Slope (OD/s)	Velocity v (µM/s)	v/e0 (1/s)
0	0.091	0.101	0.14	0.2	0.285	0.38	0.572		5	3e-05	0.00167224	0.334448
60	0.093	0.116	0.157	0.231	0.325	0.42	0.596		10	0.00025	0.0139353	2.78707
120				0.235	0.348	0.466	0.64		20	0.00028	0.0156076	3.12152
									40	0.00029	0.016165	3.233
									60	0.00053	0.0295429	5.90858
									80	0.00072	0.0401338	8.02676
									130	0.00057	0.0317726	6.35452

## Sheet: diC8-PI(4,5)P2
Figure 4 - figure supplement 2 & Table 2 (Y793C) - Source data
Buffer: 25 mM Hepes pH 7.5; 150 mM NaCl; 5 mM MgCl2; 5% glycerol; 1 mM DTT
Temperature = 25°C
Concentration Synj1 528-873 Y793C = 5 nM
Equation used to fit data in figure S4 (diC8-PI(4,5)P2): Y=Vmax*X/(Km+X); variables: Vmax, Km. Software used: Graphpad Prism
Measurement 1 - diC8-PI(4,5)P2
Values are OD values obtained from SPECTROstarNano (BMG Labtech) plate reader at 620 nm.
Time (s)	5 µM	10 µM	20 µM	40 µM	60 µM	80 µM	130 µM	150 µM	300 µM		[diC8-PI(4,5)P2] (µM)	Slope (OD/s)	Velocity v (µM/s)	v/e0 (1/s)
0	0.096	0.098	0.105	0.143	0.179	0.215	0.328	0.361	0.725		5	6e-05	0.00334448	0.668896
60	0.099	0.107	0.154	0.181	0.239	0.285	0.406	0.439	0.84		10	0.00026	0.0144928	2.89855
120	0.103	0.129	0.135	0.224	0.289	0.337	0.479	0.497	0.978		20	0.00025	0.0139353	2.78707
											40	0.00068	0.0379041	7.58082
											60	0.00092	0.0512821	10.2564
											80	0.00102	0.0568562	11.3712
											130	0.00126	0.0702341	14.0468
											150	0.00113	0.0629877	12.5975
											300	0.00211	0.117614	23.5229
Measurement 2 - diC8-PI(4,5)P2
Values are OD values obtained from SPECTROstarNano (BMG Labtech) plate reader at 620 nm.
Time (s)	5 µM	10 µM	20 µM	40 µM	60 µM	80 µM	130 µM	150 µM	300 µM		[diC8-PI(4,5)P2] (µM)	Slope (OD/s)	Velocity v (µM/s)	v/e0 (1/s)
0	0.093	0.099	0.113	0.149	0.189	0.236	0.322	0.364	0.714		5	7e-05	0.0039019	0.780379
60	0.097	0.112	0.148	0.21	0.237	0.319	0.435	0.493	0.819		10	0.00013	0.00724638	1.44928
120		0.114	0.161	0.253	0.305	0.381	0.564	0.607	0.978		20	0.0004	0.0222965	4.45931
											40	0.00087	0.048495	9.699
											60	0.00097	0.0540691	10.8138
											80	0.00121	0.067447	13.4894
											130	0.00202	0.112598	22.5195
											150	0.00203	0.113155	22.631
											300	0.0022	0.122631	24.5262
Measurement 3 - diC8-PI(4,5)P2
Values are OD values obtained from SPECTROstarNano (BMG Labtech) plate reader at 620 nm.
Time (s)	5 µM	10 µM	20 µM	40 µM	60 µM	80 µM	130 µM	150 µM	300 µM		[diC8-PI(4,5)P2] (µM)	Slope (OD/s)	Velocity v (µM/s)	v/e0 (1/s)
0	0.094	0.096	0.113	0.156	0.194	0.209	0.345	0.362	0.724		5	8e-05	0.00445931	0.891862
60	0.099	0.104	0.138	0.2	0.261	0.306	0.439	0.475	0.804		10	0.000158	0.00880713	1.76143
120	0.09	0.115	0.153	0.241	0.325	0.357	0.531	0.554	0.938		20	0.000333	0.0185619	3.71237
											40	0.00071	0.0401338	8.02676
											60	0.00109	0.0607581	12.1516
											80	0.00123	0.0685619	13.7124
											130	0.00155	0.0863991	17.2798
											130	0.0016	0.0891862	17.8372
											130	0.00178	0.0992196	19.8439

## Sheet: diC8-PI(3,5)P2
Figure 4 - figure supplement 2 & Table 2 (Y793C) - Source data
Buffer: 25 mM Hepes pH 7.5; 150 mM NaCl; 5 mM MgCl2; 5% glycerol; 1 mM DTT
Temperature = 25°C
Concentration Synj1 528-873 Y793C = 500 nM
Equation used to fit data in figure S4 (diC8-PI(3,5)P2): Y=Vmax*X/(Km+X); variables: Vmax, Km. Software used: Graphpad Prism
Measurement 1 - diC8-PI(3,5)P2
Values are OD values obtained from SPECTROstarNano (BMG Labtech) plate reader at 620 nm.
Time (s)	10 µM	20 µM	40 µM	80 µM	130 µM	200 µM	300 µM		[diC8-PI(3,5)P2] (µM)	Slope (OD/s)	Velocity v (µM/s)	v/e0 (1/s)
0	0.118	0.138	0.163	0.246	0.343	0.534	0.766		10	1e-05	0.000557414	0.00111483
300	0.123	0.145	0.191	0.26	0.366	0.556	0.785		20	2.3e-05	0.00128205	0.0025641
600	0.124	0.197	0.188	0.273	0.384	0.521	0.811		40	4.2e-05	0.00234114	0.00468227
									80	4.5e-05	0.00250836	0.00501672
									130	6.8e-05	0.00379041	0.00758082
									200	7.3e-05	0.00406912	0.00813824
									300	7.5e-05	0.0041806	0.0083612
Measurement 2 - diC8-PI(3,5)P2
Values are OD values obtained from SPECTROstarNano (BMG Labtech) plate reader at 620 nm.
Time (s)	10 µM	20 µM	40 µM	80 µM	130 µM	200 µM	300 µM		[diC8-PI(3,5)P2] (µM)	Slope (OD/s)	Velocity v (µM/s)	v/e0 (1/s)
0	0.107	0.125	0.159	0.253	0.358	0.534	0.641		10	1.5e-05	0.00083612	0.00167224
300	0.123	0.131	0.171	0.263	0.374	0.559	0.664		20	1.7e-05	0.000947603	0.00189521
600	0.116	0.135	0.18	0.276	0.381	0.573			40	3.5e-05	0.00195095	0.0039019
									80	3.8e-05	0.00211817	0.00423634
									130	4e-05	0.00222965	0.00445931
									200	6.5e-05	0.00362319	0.00724638
									300	7.7e-05	0.00429208	0.00858417
Measurement 3 - diC8-PI(3,5)P2
Values are OD values obtained from SPECTROstarNano (BMG Labtech) plate reader at 620 nm.
Time (s)	10 µM	20 µM	40 µM	80 µM	130 µM	200 µM	300 µM		[diC8-PI(3,5)P2] (µM)	Slope (OD/s)	Velocity v (µM/s)	v/e0 (1/s)
0	0.107	0.128	0.16	0.243	0.363		0.755		10	5e-06	0.000278707	0.000557414
300		0.132	0.172	0.249	0.367				20	1.3e-05	0.000724638	0.00144928
600	0.11		0.176	0.268	0.397		0.813		40	4e-05	0.00222965	0.00445931
									80	4.2e-05	0.00234114	0.00468227
									130	5.7e-05	0.00317726	0.00635452
									200
									300	9.7e-05	0.00540691	0.0108138

## Sheet: diC8-PI(5)P
Figure 4 - figure supplement 2 & Table 2 (Y793C) - Source data
Buffer: 25 mM Hepes pH 7.5; 150 mM NaCl; 5 mM MgCl2; 5% glycerol; 1 mM DTT
Temperature = 25°C
Concentration Synj1 528-873 Y793C = 500 nM
Equation used to fit data in figure S4 (diC8-PI(5)P): Linear regression through (0,0). Software used: Graphpad Prism
Measurement 1 - diC8-PI(5)P
Values are OD values obtained from SPECTROstarNano (BMG Labtech) plate reader at 620 nm.
Time (s)	20 µM	40 µM	80 µM		[diC8-PI(5)P] (µM)	Slope (OD/s)	Velocity v (µM/s)	v/e0 (1/s)
0	0.134	0.155	0.282		20	3e-05	0.00167224	0.00334448
900	0.142	0.172	0.31		40	6e-05	0.00334448	0.00668896
1800		0.191	0.358		80	0.000127	0.00707915	0.0141583
Measurement 2 - diC8-PI(5)P
Values are OD values obtained from SPECTROstarNano (BMG Labtech) plate reader at 620 nm.
Time (s)	20 µM	40 µM	80 µM		[diC8-PI(5)P] (µM)	Slope (OD/s)	Velocity v (µM/s)	v/e0 (1/s)
0	0.134	0.145	0.207		20	2e-05	0.00111483	0.00222965
900	0.141	0.156	0.239		40	4e-05	0.00222965	0.00445931
1800	0.148	0.171	0.273		80	0.00011	0.00613155	0.0122631
Measurement 3 - diC8-PI(5)P
Values are OD values obtained from SPECTROstarNano (BMG Labtech) plate reader at 620 nm.
Time (s)	20 µM	40 µM	80 µM		[diC8-PI(5)P] (µM)	Slope (OD/s)	Velocity v (µM/s)	v/e0 (1/s)
0	0.131	0.149	0.173		20	2e-05	0.00111483	0.00222965
900	0.135	0.16			40	4e-05	0.00222965	0.00445931
1800	0.143		0.209		80	6e-05	0.00334448	0.00668896

## Sheet: IP3
Figure 4 - figure supplement 2 & Table 2 (Y793C) - Source data
Buffer: 25 mM Hepes pH 7.5; 150 mM NaCl; 5 mM MgCl2; 5% glycerol; 1 mM DTT
Temperature = 25°C
Concentration Synj1 528-873 Y793C = 50 nM
Equation used to fit data in figure S4 (IP3): Y=Vmax*X/(Km+X); variables: Vmax, Km. Software used: Graphpad Prism
Measurement 1 - IP3
Values are OD values obtained from SPECTROstarNano (BMG Labtech) plate reader at 620 nm.
Time (s)	20 µM	40 µM	80 µM	120 µM	240 µM	320 µM	500 µM	800 µM		[IP3] (µM)	Slope (OD/s)	Velocity v (µM/s)	v/e0 (1/s)
0	0.089	0.089	0.108	0.129	0.191	0.233	0.319	0.475		20	2e-05	0.00111483	0.0222965
300	0.092	0.104	0.142	0.184	0.3	0.386	0.477	0.688		40	4e-05	0.00222965	0.0445931
600	0.103	0.115	0.157	0.226	0.37	0.465	0.598	0.72		80	8e-05	0.00445931	0.0891862
										120	0.00016	0.00891862	0.178372
										240	0.0003	0.0167224	0.334448
										320	0.00039	0.0217391	0.434783
										500	0.00047	0.0261984	0.523969
										800	0.00071	0.0395764	0.791527
Measurement 2 - IP3
Values are OD values obtained from SPECTROstarNano (BMG Labtech) plate reader at 620 nm.
Time (s)	20 µM	40 µM	80 µM	120 µM	240 µM	320 µM	500 µM	800 µM		[IP3] (µM)	Slope (OD/s)	Velocity v (µM/s)	v/e0 (1/s)
0	0.099	0.1	0.121	0.133	0.185	0.258	0.342	0.46		20	2e-05	0.00111483	0.0222965
300	0.105	0.12	0.172	0.19	0.304	0.389	0.501	0.674		40	6e-05	0.00334448	0.0668896
600	0.11	0.135	0.208	0.232	0.349	0.487	0.64	0.686		80	0.00015	0.0083612	0.167224
										120	0.00017	0.00947603	0.189521
										240	0.00027	0.0150502	0.301003
										320	0.00038	0.0211817	0.423634
										500	0.0005	0.0278707	0.557414
										800	0.00071	0.0395764	0.791527
Measurement 3 - IP3
Values are OD values obtained from SPECTROstarNano (BMG Labtech) plate reader at 620 nm.
Time (s)	20 µM	40 µM	80 µM	120 µM	240 µM	320 µM	500 µM	800 µM		[IP3] (µM)	Slope (OD/s)	Velocity v (µM/s)	v/e0 (1/s)
0	0.102	0.106	0.137	0.158	0.198	0.264	0.354	0.478		20	1e-05	0.000557414	0.0111483
300		0.124	0.17	0.214	0.305	0.406	0.597	0.637		40	6.7e-05	0.00373467	0.0746934
600	0.109	0.146	0.179	0.252	0.382	0.498	0.656			80	7e-05	0.0039019	0.0780379
										120	0.00016	0.00891862	0.178372
										240	0.00031	0.0172798	0.345596
										320	0.00039	0.0217391	0.434783
										500	0.0005	0.0278707	0.557414
										800	0.00053	0.0295429	0.590858
