# Supplementary material for: A structure of substrate-bound Synaptojanin1 provides new insights in its mechanism and the effect of disease mutations
Source: eLife. 2020 Dec 22;9:e64922. doi: 10.7554/eLife.64922 (PMC7781601; doi:10.7554/eLife.64922)
Supplement: Figure 4—figure supplement 3—source data 1. [file elife-64922-fig4-figsupp3-data1.xlsx]

## Sheet: StandardCurve
Figure 4 - figure supplement 3 & Table 2 (R800C) - Source data
Buffer: 25 mM Hepes pH 7.5; 150 mM NaCl; 2 mM MgCl2; 5% glycerol; 1 mM DTT
Temperature: 25°C
Data were fit on a linear regression.
[phosphate] (µM)	Measurement 1	Measurement 2	Measurement 3	Measurement 4
40		0.843	0.804	0.747
32	0.697	0.717	0.665	0.598
24	0.599	0.545	0.526	0.489
16	0.383	0.411	0.408	0.351
12	0.312	0.331	0.319	0.247
8	0.244	0.248	0.234	0.187
4	0.161	0.211	0.217	0.116
0	0.094	0.091	0.094	0.073
Slope of the standard curve = 0.01794

## Sheet: diC8-PI(3,4,5)P3
Figure 4 - figure supplement 3 & Table 2 (R800C) - Source data
Buffer: 25 mM Hepes pH 7.5; 150 mM NaCl; 5 mM MgCl2; 5% glycerol; 1 mM DTT
Temperature = 25°C
Concentration Synj1 528-873 R800C = 20 nM
Equation used to fit data in figure S5 (diC8-PI(3,4,5)P3): Y=Vmax*X/(Km+X); variables: Vmax, Km. Software used: Graphpad Prism
Measurement 1 - diC8-PI(3,4,5)P3
Values are OD values obtained from SPECTROstarNano (BMG Labtech) plate reader at 620 nm.
Time (s)	5 µM	10 µM	20 µM	25 µM	30 µM	40 µM	60 µM	80 µM	130 µM	200 µM		[diC8-PI(3,4,5)P3] (µM)	Slope (OD/s)	Velocity v (µM/s)	v/e0 (1/s)
0	0.091	0.095	0.125	0.104	0.116	0.156	0.26	0.294	0.524	0.721		5	4e-05	0.00222965	0.111483
60	0.093	0.111	0.156	0.161	0.177	0.252	0.373	0.428	0.721	1.05		10	0.00023	0.0128205	0.641026
120	0.096	0.123	0.189	0.189	0.177	0.363	0.423	0.509	0.927	1.296		20	0.00053	0.0295429	1.47715
												25	0.00071	0.0395764	1.97882
												30	0.00102	0.0568562	2.84281
												40	0.00173	0.0964326	4.82163
												60	0.00136	0.0758082	3.79041
												80	0.00179	0.099777	4.98885
												130	0.00336	0.187291	9.36455
												200	0.00479	0.267001	13.3501
Measurement 2 - diC8-PI(3,4,5)P3
Values are OD values obtained from SPECTROstarNano (BMG Labtech) plate reader at 620 nm.
Time (s)	5 µM	10 µM	20 µM	25 µM	30 µM	40 µM	60 µM	80 µM	130 µM	200 µM		[diC8-PI(3,4,5)P3] (µM)	Slope (OD/s)	Velocity v (µM/s)	v/e0 (1/s)
0	0.077	0.094	0.096	0.17	0.19	0.17	0.248	0.347	0.353	0.773		5	5.8e-05	0.003233	0.16165
60	0.08	0.098	0.127	0.299	0.351	0.261	0.373	0.447	0.553	0.955		10	7.5e-05	0.0041806	0.20903
120	0.084	0.103	0.158	0.398	0.449	0.31	0.455	0.588	0.851	1.227		20	0.00052	0.0289855	1.44928
												25	0.0019	0.105909	5.29543
												30	0.00216	0.120401	6.02007
												40	0.00117	0.0652174	3.26087
												60	0.00173	0.0964326	4.82163
												80	0.00201	0.11204	5.60201
												130	0.00415	0.231327	11.5663
												200	0.00378	0.210702	10.5351
Measurement 3 - diC8-PI(3,4,5)P3
Values are OD values obtained from SPECTROstarNano (BMG Labtech) plate reader at 620 nm.
Time (s)	5 µM	10 µM	20 µM	25 µM	30 µM	40 µM	60 µM	80 µM	130 µM			[diC8-PI(3,4,5)P3] (µM)	Slope (OD/s)	Velocity v (µM/s)	v/e0 (1/s)
0	0.083	0.092	0.093	0.163	0.168	0.169	0.24	0.299	0.525			5	0.00018	0.0100334	0.501672
60	0.089	0.121	0.122	0.29	0.263	0.298	0.409	0.511	0.748			10	0.00068	0.0379041	1.89521
120	0.104	0.174	0.144	0.379	0.346	0.405	0.574	0.693	1.012			20	0.00043	0.0239688	1.19844
												25	0.0018	0.100334	5.01672
												30	0.00148	0.0824972	4.12486
												40	0.00197	0.10981	5.49052
												60	0.00278	0.154961	7.74805
												80	0.00328	0.182832	9.14158
												130	0.00406	0.22631	11.3155
Measurement 3 - diC8-PI(3,4,5)P3
Values are OD values obtained from SPECTROstarNano (BMG Labtech) plate reader at 620 nm.
Time (s)	10 µM	60 µM										[diC8-PI(3,4,5)P3] (µM)	Slope (OD/s)	Velocity v (µM/s)	v/e0 (1/s)
0	0.106	0.308										10	0.0004	0.0222965	1.11483
60	0.138	0.474										60	0.00276	0.153846	7.69231
120	0.154	0.639

## Sheet: diC8-PI(4,5)P2
Figure 4 - figure supplement 3 & Table 2 (R800C) - Source data
Buffer: 25 mM Hepes pH 7.5; 150 mM NaCl; 5 mM MgCl2; 5% glycerol; 1 mM DTT
Temperature = 25°C
Concentration Synj1 528-873 R800C = 50 nM
Equation used to fit data in figure S5 (diC8-PI(4,5)P2): Y=Vmax*X/(Km+X); variables: Vmax, Km. Software used: Graphpad Prism
Measurement 1 - diC8-PI(4,5)P2
Values are OD values obtained from SPECTROstarNano (BMG Labtech) plate reader at 620 nm.
Time (s)	5 µM	10 µM	20 µM	40 µM	60 µM	80 µM	130 µM	150 µM		[diC8-PI(4,5)P2] (µM)	Slope (OD/s)	Velocity v (µM/s)	v/e0 (1/s)
0		0.078	0.09	0.118	0.153	0.193	0.389	0.452		5	0.00015	0.0083612	0.167224
60	0.083	0.095	0.146	0.228	0.322	0.375	0.622	0.947		10	0.00066	0.0367893	0.735786
120	0.092	0.157	0.195	0.333	0.473	0.571	0.834	1.066		20	0.00088	0.0490524	0.981048
										40	0.00179	0.099777	1.99554
										60	0.00267	0.148829	2.97659
										80	0.00315	0.175585	3.51171
										130	0.00371	0.2068	4.13601
										150	0.00512	0.285396	5.70792
Measurement 2 - diC8-PI(4,5)P2
Values are OD values obtained from SPECTROstarNano (BMG Labtech) plate reader at 620 nm.
Time (s)	5 µM	10 µM	20 µM	40 µM	60 µM	80 µM	130 µM	150 µM		[diC8-PI(4,5)P2] (µM)	Slope (OD/s)	Velocity v (µM/s)	v/e0 (1/s)
0	0.081	0.088	0.099	0.171	0.202	0.252	0.344	0.368		5	0.00023	0.0128205	0.25641
60	0.096	0.118	0.17	0.338	0.477	0.552	0.729	0.735		10	0.00048	0.0267559	0.535117
120	0.108	0.145	0.222	0.479	0.682	0.78	1.014	1.103		20	0.00103	0.0574136	1.14827
										40	0.00257	0.143255	2.86511
										60	0.004	0.222965	4.45931
										80	0.0044	0.245262	4.90524
										130	0.00558	0.311037	6.22074
										150	0.00613	0.341695	6.83389
Measurement 3 - diC8-PI(4,5)P2
Values are OD values obtained from SPECTROstarNano (BMG Labtech) plate reader at 620 nm.
Time (s)	5 µM	10 µM	20 µM	40 µM	60 µM	80 µM	130 µM	150 µM		[diC8-PI(4,5)P2] (µM)	Slope (OD/s)	Velocity v (µM/s)	v/e0 (1/s)
0	0.075	0.079	0.096	0.146	0.165	0.224	0.35	0.361		5	0.00019	0.0105909	0.211817
60	0.086	0.105	0.173	0.306	0.357	0.464	0.732	0.776		10	0.00041	0.022854	0.457079
120	0.098	0.128	0.214	0.414	0.642	0.698	0.967	1.043		20	0.00098	0.0546265	1.09253
										40	0.00223	0.0401338	0.802676
										60	0.00398	0.221851	4.43701
										80	0.00395	0.220178	4.40357
										130	0.00514	0.286511	5.73021
										150	0.00568	0.316611	6.33222

## Sheet: diC8-PI(3,5)P2
Figure 4 - figure supplement 3 & Table 2 (R800C) - Source data
Buffer: 25 mM Hepes pH 7.5; 150 mM NaCl; 5 mM MgCl2; 5% glycerol; 1 mM DTT
Temperature = 25°C
Concentration Synj1 528-873 R800C = 500 nM
Equation used to fit data in figure S5 (diC8-PI(3,5)P2): Linear regression through (0,0). Software used: Graphpad Prism
Measurement 1 - diC8-PI(3,5)P2
Values are OD values obtained from SPECTROstarNano (BMG Labtech) plate reader at 620 nm.
Time (s)	10 µM	20 µM	40 µM	80 µM	130 µM	200 µM	300 µM		[diC8-PI(3,5)P2] (µM)	Slope (OD/s)	Velocity v (µM/s)	v/e0 (1/s)
0	0.099	0.105	0.144	0.224	0.322	0.469	0.66		10	5e-05	0.00278707	0.00557414
300	0.102	0.135	0.188	0.291	0.438	0.672	0.94		20	0.00011	0.00613155	0.0122631
600	0.131	0.172	0.221	0.327	0.515	0.864	1.112		40	0.00013	0.00724638	0.0144928
									80	0.00017	0.00947603	0.0189521
									130	0.00032	0.0178372	0.0356745
									200	0.00066	0.0367893	0.0735786
									300	0.00075	0.041806	0.083612
Measurement 2 - diC8-PI(3,5)P2
Values are OD values obtained from SPECTROstarNano (BMG Labtech) plate reader at 620 nm.
Time (s)	10 µM	20 µM	40 µM	80 µM	130 µM	200 µM	300 µM		[diC8-PI(3,5)P2] (µM)	Slope (OD/s)	Velocity v (µM/s)	v/e0 (1/s)
0	0.093	0.109	0.157	0.236	0.355	0.512	0.668		10	9e-05	0.00501672	0.0100334
300	0.11	0.14	0.217	0.317	0.464	0.696	0.931		20	0.000152	0.00847269	0.0169454
600	0.144	0.2	0.244	0.371	0.579	0.893	1.063		40	0.000145	0.0080825	0.016165
									80	0.00023	0.0128205	0.025641
									130	0.00037	0.0206243	0.0412486
									200	0.00064	0.0356745	0.0713489
									300	0.00066	0.0367893	0.0735786
Measurement 3 - diC8-PI(3,5)P2
Values are OD values obtained from SPECTROstarNano (BMG Labtech) plate reader at 620 nm.
Time (s)	10 µM	20 µM	40 µM	80 µM	130 µM	200 µM	300 µM		[diC8-PI(3,5)P2] (µM)	Slope (OD/s)	Velocity v (µM/s)	v/e0 (1/s)
0	0.095	0.122	0.15	0.242	0.348	0.529	0.701		10	9e-05	0.00501672	0.0100334
300	0.11	0.146	0.19	0.313	0.448	0.668	0.957		20	0.0001	0.00557414	0.0111483
600	0.129	0.182	0.228	0.376	0.512	0.826	1.116		40	0.00013	0.00724638	0.0144928
									80	0.00022	0.0122631	0.0245262
									130	0.00027	0.0150502	0.0301003
									200	0.0005	0.0278707	0.0557414
									300	0.00069	0.0384615	0.0769231

## Sheet: diC8-PI(5)P
Figure 4 - figure supplement 3 & Table 2 (R800C) - Source data
Buffer: 25 mM Hepes pH 7.5; 150 mM NaCl; 5 mM MgCl2; 5% glycerol; 1 mM DTT
Temperature = 25°C
Concentration Synj1 528-873 R800C = 200 nM
Equation used to fit data in figure S5 (diC8-PI(5)P): Linear regression through (0,0). Software used: Graphpad Prism
Measurement 1 - diC8-PI(5)P
Values are OD values obtained from SPECTROstarNano (BMG Labtech) plate reader at 620 nm.
Time (s)	20 µM	40 µM	80 µM	100 µM	150 µM		[diC8-PI(5)P] (µM)	Slope (OD/s)	Velocity v (µM/s)	v/e0 (1/s)
0	0.121	0.129	0.259	0.29	0.371		20	3e-05	0.00167224	0.0083612
300		0.168	0.324	0.523	0.638		40	0.00011	0.00613155	0.0306577
600	0.142	0.195	0.408	0.605	0.731		80	0.00025	0.0139353	0.0696767
							100	0.00053	0.0295429	0.147715
							150	0.0006	0.0334448	0.167224
Measurement 2 - diC8-PI(5)P
Values are OD values obtained from SPECTROstarNano (BMG Labtech) plate reader at 620 nm.
Time (s)	20 µM	40 µM	80 µM	100 µM	150 µM		[diC8-PI(5)P] (µM)	Slope (OD/s)	Velocity v (µM/s)	v/e0 (1/s)
0	0.119	0.143	0.235	0.271	0.399		20	6e-05	0.00334448	0.0167224
300	0.115	0.167	0.278	0.52	0.541		40	8e-05	0.00445931	0.0222965
600	0.155	0.189	0.317	0.628	0.81		80	0.00014	0.00780379	0.039019
							100	0.0006	0.0334448	0.167224
							150	0.00069	0.0384615	0.192308
Measurement 3 - diC8-PI(5)P
Values are OD values obtained from SPECTROstarNano (BMG Labtech) plate reader at 620 nm.
Time (s)	20 µM	40 µM	80 µM	100 µM	150 µM		[diC8-PI(5)P] (µM)	Slope (OD/s)	Velocity v (µM/s)	v/e0 (1/s)
0	0.113	0.162	0.253	0.248	0.418		20	4e-05	0.00222965	0.0111483
300	0.139	0.174	0.334	0.37	0.579		40	9e-05	0.00501672	0.0250836
600	0.136	0.214	0.383	0.439	0.738		80	0.00022	0.0122631	0.0613155
							100	0.00032	0.0178372	0.0891862
							150	0.00053	0.0295429	0.147715

## Sheet: IP3
Figure 4 - figure supplement 3 & Table 2 (R800C) - Source data
Buffer: 25 mM Hepes pH 7.5; 150 mM NaCl; 5 mM MgCl2; 5% glycerol; 1 mM DTT
Temperature = 25°C
Concentration Synj1 528-873 R800C = 2 µM
Equation used to fit data in figure S5 (IP3): Y=Vmax*X/(Km+X); variables: Vmax, Km. Software used: Graphpad Prism
Measurement 1 - IP3
Values are OD values obtained from SPECTROstarNano (BMG Labtech) plate reader at 620 nm.
Time (s)	20 µM	40 µM	80 µM	120 µM	160 µM	240 µM	320 µM	400 µM	500 µM		[IP3] (µM)	Slope (OD/s)	Velocity v (µM/s)	v/e0 (1/s)
0	0.184	0.158	0.152	0.191	0.155	0.235	0.329		0.314		20	0.00012	0.00668896	0.00334448
600	0.257	0.331	0.291	0.48	0.568	0.681	1.069		1.09		40	0.00032	0.0178372	0.00891862
780		0.366	0.359	0.539	0.703	0.77	1.343		1.257		80	0.00029	0.016165	0.0080825
960	0.295	0.444		0.718	0.774	0.88			1.356		120	0.00052	0.0289855	0.0144928
1200		0.55	0.499			1.036					160	0.00066	0.0367893	0.0183946
											240	0.00066	0.0367893	0.0183946
											320	0.00128	0.0713489	0.0356745
											400
											500	0.00113	0.0629877	0.0314939
Measurement 2 - IP3
Values are OD values obtained from SPECTROstarNano (BMG Labtech) plate reader at 620 nm.
Time (s)	20 µM	40 µM	80 µM	120 µM	160 µM	240 µM	320 µM	400 µM	500 µM		[IP3] (µM)	Slope (OD/s)	Velocity v (µM/s)	v/e0 (1/s)
0	0.143	0.142	0.18	0.211	0.161	0.239	0.232	0.257	0.142		20	9.6e-05	0.00535117	0.00267559
600	0.209	0.212	0.497	0.654	0.467	1.009	0.835	0.948			40	9.9e-05	0.00551839	0.0027592
780	0.22	0.221	0.522	0.634	0.533	1.26	1.074	1.181	0.923		80	0.00039	0.0217391	0.0108696
960	0.241	0.235	0.564	0.745	0.748	1.67			1.35		120	0.00056	0.0312152	0.0156076
1200	0.257		0.659			1.591	1.559		1.486		160	0.00057	0.0317726	0.0158863
											240	0.00123	0.0685619	0.0342809
											320	0.00111	0.0618729	0.0309365
											400	0.00118	0.0657748	0.0328874
											500	0.00115	0.0641026	0.0320513
Measurement 3 - IP3
Values are OD values obtained from SPECTROstarNano (BMG Labtech) plate reader at 620 nm.
Time (s)	20 µM	40 µM	80 µM	120 µM	160 µM	240 µM	320 µM	400 µM	500 µM		[IP3] (µM)	Slope (OD/s)	Velocity v (µM/s)	v/e0 (1/s)
0	0.137	0.114	0.16	0.148	0.188	0.279	0.169	0.379	0.31		20	0.00013	0.00724638	0.00362319
600	0.22		0.296	0.471	0.871				0.794		40	0.00041	0.022854	0.011427
780	0.24				0.98	1.045			1.199		80	0.00032	0.0178372	0.00891862
960	0.278	0.443	0.468	0.713	1.048	1.046	1.336	1.563	1.374		120	0.00055	0.0306577	0.0153289
1200	0.291	0.634	0.533	0.782	1.108	1.248	1.644	1.623			160	0.00079	0.0440357	0.0220178
											240	0.00081	0.0451505	0.0225753
											320	0.00123	0.0685619	0.0342809
											400	0.00109	0.0607581	0.030379
											500	0.00111	0.0618729	0.0309365
