# Supplementary material for: A structure of substrate-bound Synaptojanin1 provides new insights in its mechanism and the effect of disease mutations
Source: eLife. 2020 Dec 22;9:e64922. doi: 10.7554/eLife.64922 (PMC7781601; doi:10.7554/eLife.64922)
Supplement: Figure 4—source data 1. [file elife-64922-fig4-data1.xlsx]

## Sheet: StandardCurve
Figure 4 & Table 2 (Wild type) - Source data
Buffer: 25 mM Hepes pH 7.5; 150 mM NaCl; 2 mM MgCl2; 5% glycerol; 1 mM DTT
Temperature: 25°C
Data were fit on a linear regression.
[phosphate] (µM)	Measurement 1	Measurement 2	Measurement 3	Measurement 4
40		0.843	0.804	0.747
32	0.697	0.717	0.665	0.598
24	0.599	0.545	0.526	0.489
16	0.383	0.411	0.408	0.351
12	0.312	0.331	0.319	0.247
8	0.244	0.248	0.234	0.187
4	0.161	0.211	0.217	0.116
0	0.094	0.091	0.094	0.073
Slope of the standard curve = 0.01794

## Sheet: diC8-PI(3,4,5)P3
Figure 4 & Table 2 (Wild type) - Source data
Buffer: 25 mM Hepes pH 7.5; 150 mM NaCl; 5 mM MgCl2; 5% glycerol; 1 mM DTT
Temperature = 25°C
Concentration Synj1 528-873 = 2.5 nM
Equation used to fit data in figure 4.A (diC8-PI(3,4,5)P3): Y=Vmax*X/(Km+X); variables: Vmax, Km. Software used: Graphpad Prism
Measurement 1 - diC8-PI(3,4,5)P3
Values are OD values obtained from SPECTROstarNano (BMG Labtech) plate reader at 620 nm.
Time (s)	5 µM	10 µM	20 µM	40 µM	60 µM	80 µM	130 µM		[diC8-PI(3,4,5)P3] (µM)	Slope (OD/s)	Velocity v (µM/s)	v/e0 (1/s)
0	0.079	0.082	0.109	0.16	0.209	0.266	0.442		5	0.00028	0.0156076	6.24303
60	0.099	0.106	0.158	0.232	0.277	0.35	0.514		10	0.00038	0.0211817	8.47269
120	0.113	0.128	0.197	0.306	0.354	0.398	0.558		20	0.00073	0.0406912	16.2765
									40	0.00122	0.0680045	27.2018
									60	0.00121	0.067447	26.9788
									80	0.0011	0.0613155	24.5262
									130	0.00097	0.0540691	21.6276
Measurement 2 - diC8-PI(3,4,5)P3
Values are OD values obtained from SPECTROstarNano (BMG Labtech) plate reader at 620 nm.
Time (s)	5 µM	10 µM	20 µM	40 µM	60 µM	80 µM	130 µM		[diC8-PI(3,4,5)P3] (µM)	Slope (OD/s)	Velocity v (µM/s)	v/e0 (1/s)
0	0.08	0.087	0.113	0.163	0.223	0.285	0.457		5	0.00028	0.0156076	6.24303
60	0.104	0.104	0.16	0.217	0.281	0.344	0.498		10	0.00028	0.0156076	6.24303
120	0.113	0.12	0.212	0.266	0.334	0.399	0.572		20	0.00083	0.0462653	18.5061
									40	0.00086	0.0479376	19.175
									60	0.00093	0.0518395	20.7358
									80	0.00095	0.0529543	21.1817
									130	0.00096	0.0535117	21.4047
Measurement 3 - diC8-PI(3,4,5)P3
Values are OD values obtained from SPECTROstarNano (BMG Labtech) plate reader at 620 nm.
Time (s)	5 µM	10 µM	20 µM	40 µM	60 µM	80 µM	130 µM		[diC8-PI(3,4,5)P3] (µM)	Slope (OD/s)	Velocity v (µM/s)	v/e0 (1/s)
0	0.079	0.097	0.11	0.188	0.241	0.313	0.464		5	0.00026	0.0144928	5.7971
60	0.095	0.112	0.164	0.28	0.3	0.412	0.529		10	0.00028	0.0156076	6.24303
120	0.11	0.13	0.211	0.321	0.392	0.464	0.624		20	0.00084	0.0468227	18.7291
									40	0.00111	0.0618729	24.7492
									60	0.00126	0.0702341	28.0936
									80	0.00126	0.0702341	28.0936
									130	0.00133	0.074136	29.6544

## Sheet: diC8-PI(4,5)P2
Figure 4 & Table 2 (Wild type) - Source data
Buffer: 25 mM Hepes pH 7.5; 150 mM NaCl; 5 mM MgCl2; 5% glycerol; 1 mM DTT
Temperature = 25°C
Concentration Synj1 528-873 = 1 nM
Equation used to fit data in figure 4.A (diC8-PI(4,5)P2): Y=Vmax*X/(Km+X); variables: Vmax, Km. Software used: Graphpad Prism
Measurement 1 - diC8-PI(4,5)P2
Values are OD values obtained from SPECTROstarNano (BMG Labtech) plate reader at 620 nm.
Time (s)	5 µM	10 µM	20 µM	40 µM	60 µM	80 µM	130 µM		[diC8-PI(4,5)P2] (µM)	Slope (OD/s)	Velocity v (µM/s)	v/e0 (1/s)
0	0.07	0.073	0.082	0.105	0.121	0.143	0.201		5	0.00012	0.00668896	6.68896
60	0.076	0.086	0.108	0.162	0.186	0.212	0.268		10	0.00026	0.0144928	14.4928
120	0.084	0.104	0.138	0.21	0.242	0.268	0.328		20	0.00047	0.0261984	26.1984
									40	0.00088	0.0490524	49.0524
									60	0.00101	0.0562988	56.2988
									80	0.00104	0.057971	57.971
									130	0.00106	0.0590858	59.0858
Measurement 2 - diC8-PI(4,5)P2
Values are OD values obtained from SPECTROstarNano (BMG Labtech) plate reader at 620 nm.
Time (s)	5 µM	10 µM	20 µM	40 µM	60 µM	80 µM	130 µM		[diC8-PI(4,5)P2] (µM)	Slope (OD/s)	Velocity v (µM/s)	v/e0 (1/s)
0	0.076	0.08	0.082	0.092	0.14	0.123	0.153		5	0.00015	0.0083612	8.3612
60	0.084	0.095	0.101	0.142	0.196	0.189	0.21		10	0.00024	0.0133779	13.3779
120	0.094	0.109	0.118	0.198	0.257	0.262	0.284		20	0.0003	0.0167224	16.7224
									40	0.00088	0.0490524	49.0524
									60	0.00098	0.0546265	54.6265
									80	0.00116	0.06466	64.66
									130	0.00109	0.0607581	60.7581
Measurement 3 - diC8-PI(4,5)P2
Values are OD values obtained from SPECTROstarNano (BMG Labtech) plate reader at 620 nm.
Time (s)	5 µM	10 µM	20 µM	40 µM	60 µM	80 µM	130 µM		[diC8-PI(4,5)P2] (µM)	Slope (OD/s)	Velocity v (µM/s)	v/e0 (1/s)
0	0.075	0.079	0.091	0.106	0.135	0.164			5	0.00013	0.00724638	7.24638
60	0.085	0.092	0.117	0.149	0.205		0.291		10	0.00028	0.0156076	15.6076
120	0.09	0.112	0.15	0.192	0.273	0.287	0.353		20	0.00049	0.0273133	27.3133
									40	0.00072	0.0401338	40.1338
									60	0.00115	0.0641026	64.1026
									80	0.00103	0.0574136	57.4136
									130	0.00103	0.0574136	57.4136

## Sheet: diC8-PI(3,5)P2
Figure 4 & Table 2 (Wild type) - Source data
Buffer: 25 mM Hepes pH 7.5; 150 mM NaCl; 5 mM MgCl2; 5% glycerol; 1 mM DTT
Temperature = 25°C
Concentration Synj1 528-873 = 200 nM
Equation used to fit data in figure 4.A (diC8-PI(3,5)P2): Y=Vmax*X/(Km+X); variables: Vmax, Km. Software used: Graphpad Prism
Measurement 1 - diC8-PI(3,5)P2
Values are OD values obtained from SPECTROstarNano (BMG Labtech) plate reader at 620 nm.
Time (s)	10 µM	20 µM	40 µM	60 µM	80 µM	100 µM	130 µM	150 µM	300 µM		[diC8-PI(3,5)P2] (µM)	Slope (OD/s)	Velocity v (µM/s)	v/e0 (1/s)
0	0.083	0.092	0.127	0.147	0.18	0.216	0.272	0.295	0.832		10	3.6e-05	0.00200669	0.0100334
600	0.102	0.143	0.161	0.205	0.255	0.296	0.369	0.4	0.934		20	8e-05	0.00445931	0.0222965
1200	0.126	0.188	0.209	0.258	0.311	0.377	0.439	0.481	1.03		40	6.8e-05	0.00379041	0.0189521
											60	9.3e-05	0.00518395	0.0259197
											80	0.000109	0.00607581	0.030379
											100	0.000134	0.00746934	0.0373467
											130	0.000139	0.00774805	0.0387402
											150	0.000155	0.00863991	0.0431996
											300	0.000165	0.00919732	0.0459866
Measurement 2 - diC8-PI(3,5)P2
Values are OD values obtained from SPECTROstarNano (BMG Labtech) plate reader at 620 nm.
Time (s)	10 µM	20 µM	40 µM	60 µM	80 µM	100 µM	130 µM	150 µM	300 µM		[diC8-PI(3,5)P2] (µM)	Slope (OD/s)	Velocity v (µM/s)	v/e0 (1/s)
0	0.081	0.114	0.126	0.156	0.189	0.222	0.274	0.365	0.589		10	4.7e-05	0.00261984	0.0130992
600	0.105	0.133	0.169	0.214	0.242	0.278	0.352	0.457	0.733		20	5.4e-05	0.00301003	0.0150502
1200	0.137	0.179	0.23	0.262	0.293	0.347	0.44	0.558	0.865		40	8.7e-05	0.0048495	0.0242475
											60	8.8e-05	0.00490524	0.0245262
											80	8.7e-05	0.0048495	0.0242475
											100	0.000104	0.0057971	0.0289855
											130	0.000138	0.00769231	0.0384615
											150	0.000161	0.00897436	0.0448718
											300	0.00023	0.0128205	0.0641026
Measurement 3 - diC8-PI(3,5)P2
Values are OD values obtained from SPECTROstarNano (BMG Labtech) plate reader at 620 nm.
Time (s)	10 µM	20 µM	40 µM	60 µM	80 µM	100 µM	130 µM	150 µM	300 µM		[diC8-PI(3,5)P2] (µM)	Slope (OD/s)	Velocity v (µM/s)	v/e0 (1/s)
0	0.079	0.097	0.127	0.194	0.236	0.212	0.264	0.35	0.676		10	3.9e-05	0.00217391	0.0108696
600	0.105	0.145	0.184	0.279	0.3	0.289	0.376	0.451	0.834		20	8e-05	0.00445931	0.0222965
1200	0.126	0.193	0.24	0.314	0.369	0.359	0.434	0.542	1.016		40	9.4e-05	0.00523969	0.0261984
											60	0.0001	0.00557414	0.0278707
											80	0.000111	0.00618729	0.0309365
											100	0.000123	0.00685619	0.0342809
											130	0.000142	0.00791527	0.0395764
											150	0.00016	0.00891862	0.0445931
											300	0.000283	0.0157748	0.078874

## Sheet: diC8-PI(5)P
Figure 4 & Table 2 (Wild type) - Source data
Buffer: 25 mM Hepes pH 7.5; 150 mM NaCl; 5 mM MgCl2; 5% glycerol; 1 mM DTT
Temperature = 25°C
Concentration Synj1 528-873 = 100 nM
Equation used to fit data in figure 4.A (diC8-PI(5)P): Linear regression through (0,0). Software used: Graphpad Prism
Measurement 1 - diC8-PI(5)P
Values are OD values obtained from SPECTROstarNano (BMG Labtech) plate reader at 620 nm.
Time (s)	10 µM	20 µM	40 µM	80 µM	120 µM	150 µM	200 µM	300 µM		[diC8-PI(5)P] (µM)	Slope (OD/s)	Velocity v (µM/s)	v/e0 (1/s)
0	0.091	0.099	0.122	0.215	0.269	0.339	0.49	0.628		10	4.2e-05	0.00234114	0.0234114
300		0.117	0.167	0.302	0.368	0.48	0.599	0.914		20	8.2e-05	0.00457079	0.0457079
600	0.116	0.148	0.212	0.388	0.492	0.694	0.914	1.23		40	0.00015	0.0083612	0.083612
										80	0.000288	0.0160535	0.160535
										120	0.000372	0.0207358	0.207358
										150	0.000592	0.0329989	0.329989
										200	0.000707	0.0394091	0.394091
										300	0.001003	0.0559086	0.559086
Measurement 2 - diC8-PI(5)P
Values are OD values obtained from SPECTROstarNano (BMG Labtech) plate reader at 620 nm.
Time (s)	10 µM	20 µM	40 µM	80 µM	120 µM	150 µM	200 µM	300 µM		[diC8-PI(5)P] (µM)	Slope (OD/s)	Velocity v (µM/s)	v/e0 (1/s)
0	0.096	0.098	0.128	0.219	0.311	0.359	0.488	0.693		10	1.3e-05	0.000724638	0.00724638
300		0.106	0.154	0.263	0.41	0.525	0.644	0.958		20	7e-05	0.0039019	0.039019
600	0.104	0.14	0.162	0.298	0.455	0.576	0.79	1.119		40	5.7e-05	0.00317726	0.0317726
										80	0.000132	0.00735786	0.0735786
										120	0.00024	0.0133779	0.133779
										150	0.000362	0.0201784	0.201784
										200	0.000503	0.0280379	0.280379
										300	0.00071	0.0395764	0.395764
Measurement 3 - diC8-PI(5)P
Values are OD values obtained from SPECTROstarNano (BMG Labtech) plate reader at 620 nm.
Time (s)	10 µM	20 µM	40 µM	80 µM	120 µM	150 µM	200 µM	300 µM		[diC8-PI(5)P] (µM)	Slope (OD/s)	Velocity v (µM/s)	v/e0 (1/s)
0	0.104	0.105		0.206	0.307	0.376	0.505	0.72		10	2.5e-05	0.00139353	0.0139353
300		0.125	0.155	0.242	0.394	0.494	0.644	0.927		20	5.5e-06	0.000306577	0.00306577
600	0.119	0.138	0.174	0.303	0.469	0.576	0.726	1.068		40	6.3e-05	0.00351171	0.0351171
										80	0.000162	0.0090301	0.090301
										120	0.00027	0.0150502	0.150502
										150	0.000333	0.0185619	0.185619
										200	0.000368	0.0205128	0.205128
										300	0.00058	0.03233	0.3233

## Sheet: IP3
Figure 4 & Table 2 (Wild type) - Source data
Buffer: 25 mM Hepes pH 7.5; 150 mM NaCl; 5 mM MgCl2; 5% glycerol; 1 mM DTT
Temperature = 25°C
Concentration Synj1 528-873 = 10 nM
Equation used to fit data in figure 4.A (IP3): Y=Vmax*X/(Km+X); variables: Vmax, Km. Software used: Graphpad Prism
Measurement 1 - IP3
Values are OD values obtained from SPECTROstarNano (BMG Labtech) plate reader at 620 nm.
Time (s)	20 µM	40 µM	80 µM	120 µM	160 µM	240 µM	320 µM	400 µM	500 µM		[IP3] (µM)	Slope (OD/s)	Velocity v (µM/s)	v/e0 (1/s)
0	0.117	0.115	0.15	0.171	0.181	0.212	0.27	0.311	0.341		20	0.000333333	0.0185805	1.85805
30	0.119	0.158	0.185	0.219	0.237	0.275	0.345	0.37	0.406		40	0.000653333	0.0364177	3.64177
60	0.132	0.165	0.237	0.265	0.287	0.324	0.415	0.461	0.454		80	0.00117	0.0652174	6.52174
90	0.145	0.182	0.258	0.315	0.348	0.37	0.482	0.52	0.513		120	0.0015	0.083612	8.3612
120	0.154	0.201	0.289	0.348	0.397	0.417	0.531	0.565	0.567		160	0.00181	0.100892	10.0892
											240	0.00168333	0.0938313	9.38313
											320	0.00219667	0.122445	12.2445
											400	0.00219333	0.122259	12.2259
											500	0.00186333	0.103865	10.3865
Measurement 2 - IP3
Values are OD values obtained from SPECTROstarNano (BMG Labtech) plate reader at 620 nm.
Time (s)	20 µM	40 µM	80 µM	120 µM	160 µM	240 µM	320 µM	400 µM	500 µM		[IP3] (µM)	Slope (OD/s)	Velocity v (µM/s)	v/e0 (1/s)
0	0.114	0.131	0.188	0.176	0.232	0.264		0.381	0.428		20	0.00046	0.025641	2.5641
30	0.127	0.156	0.212	0.229	0.294	0.344	0.398	0.456	0.507		40	0.000883333	0.0492382	4.92382
60	0.154	0.184	0.286	0.273	0.35	0.415	0.482	0.545	0.614		80	0.00181667	0.101263	10.1263
90	0.153	0.213	0.345	0.317	0.419	0.486	0.549	0.611	0.703		120	0.00152667	0.0850985	8.50985
120	0.17	0.235		0.361	0.46	0.55	0.576	0.702	0.754		160	0.00193667	0.107952	10.7952
											240	0.00238	0.132664	13.2664
											320	0.00200333	0.111669	11.1669
											400	0.00265667	0.148086	14.8086
											500	0.00282667	0.157562	15.7562
Measurement 3 - IP3
Values are OD values obtained from SPECTROstarNano (BMG Labtech) plate reader at 620 nm.
Time (s)	20 µM	40 µM	80 µM	120 µM	160 µM	240 µM	320 µM	400 µM	500 µM		[IP3] (µM)	Slope (OD/s)	Velocity v (µM/s)	v/e0 (1/s)
0	0.101	0.098	0.129	0.167	0.221	0.232	0.333	0.382	0.386		20	0.000268333	0.0149573	1.49573
30	0.107	0.151		0.268	0.253	0.361	0.375	0.455	0.526		40	0.000736667	0.0410628	4.10628
60	0.113	0.175	0.219	0.278	0.421	0.473	0.457	0.513	0.56		80	0.001385	0.0772018	7.72018
90		0.178	0.266	0.371	0.425	0.512	0.554	0.594	0.632		120	0.00180333	0.10052	10.052
120	0.133	0.195	0.291	0.386	0.433	0.564	0.62	0.629	0.712		160	0.00198667	0.11074	11.074
											240	0.00271667	0.151431	15.1431
											320	0.00251	0.139911	13.9911
											400	0.00211	0.117614	11.7614
											500	0.00252667	0.14084	14.084

## Sheet: diC8-PI(4,5)P2 - NO Mg2+
Figure 4 & Table 2 (Wild type) - Source data
Buffer: 25 mM Hepes pH 7.5; 150 mM NaCl; 5% glycerol; 1 mM DTT; 1 mM EDTA
Temperature = 25°C
Concentration Synj1 528-873 = 1 µM
Equation used to fit data in figure 4.A (diC8-PI(4,5)P2 without Mg2+): Y=Vmax*X/(Km+X); variables: Vmax, Km. Software used: Graphpad Prism
Measurement 1 - diC8-PI(4,5)P2 without Mg2+
Values are OD values obtained from SPECTROstarNano (BMG Labtech) plate reader at 620 nm.
Time (s)	10 µM	20 µM	40 µM	60 µM	80 µM	130 µM	200 µM	300 µM		[diC8-PI(4,5)P2] (µM)	Slope (OD/s)	Velocity v (µM/s)	v/e0 (1/s)
0	0.097	0.103	0.135	0.165	0.201	0.296	0.43	0.625		10	4.4e-05	0.00245262	0.00245262
600	0.125	0.161	0.228	0.315	0.37	0.517	0.574	0.754		20	0.000112	0.00624303	0.00624303
1200	0.15	0.237	0.319	0.422	0.522	0.684	0.715	0.918		40	0.000153	0.00852843	0.00852843
										60	0.000124	0.00691193	0.00691193
										80	0.000268	0.0149387	0.0149387
										130	0.000323	0.0180045	0.0180045
										200	0.000475	0.0264771	0.0264771
										300	0.000488	0.0272018	0.0272018
Measurement 2 - diC8-PI(4,5)P2 without Mg2+
Values are OD values obtained from SPECTROstarNano (BMG Labtech) plate reader at 620 nm.
Time (s)	10 µM	20 µM	40 µM	60 µM	80 µM	130 µM	200 µM	300 µM		[diC8-PI(4,5)P2] (µM)	Slope (OD/s)	Velocity v (µM/s)	v/e0 (1/s)
0	0.093	0.103	0.122	0.169	0.184	0.287	0.436	0.691		10	5.5e-05	0.00306577	0.00306577
600	0.124	0.161	0.219	0.324	0.361	0.535	0.621	0.914		20	9e-05	0.00501672	0.00501672
1200	0.159	0.211	0.319	0.436	0.512	0.686	0.785	1.13		40	0.000164	0.00914158	0.00914158
										60	0.000223	0.0124303	0.0124303
										80	0.000273	0.0152174	0.0152174
										130	0.000333	0.0185619	0.0185619
										200	0.000582	0.0324415	0.0324415
										300	0.000732	0.0408027	0.0408027
Measurement 3 - diC8-PI(4,5)P2 without Mg2+
Values are OD values obtained from SPECTROstarNano (BMG Labtech) plate reader at 620 nm.
Time (s)	10 µM	20 µM	40 µM	60 µM	80 µM	130 µM	200 µM	300 µM		[diC8-PI(4,5)P2] (µM)	Slope (OD/s)	Velocity v (µM/s)	v/e0 (1/s)
0	0.106	0.104	0.12	0.15	0.177	0.255	0.453	0.65		10	3.8e-05	0.00211817	0.00211817
600	0.12	0.161	0.198	0.258	0.337	0.475	0.584	0.742		20	7.3e-05	0.00406912	0.00406912
1200	0.151	0.192	0.261	0.353	0.461	0.65	0.734	0.943		40	0.000118	0.00657748	0.00657748
										60	0.000169	0.00942029	0.00942029
										80	0.000237	0.0132107	0.0132107
										130	0.000329	0.0183389	0.0183389
										200	0.000468	0.026087	0.026087
										300	0.000488	0.0272018	0.0272018
